# Supplementary material for: Preparation of supramolecular silicone elastomersviahomo- and hetero-assembly
Source: Royal Society of Chemistry journal article supplement (doi:10.1039/c7nj04468b), 2017-12-26
Supplement: c7nj04468b1.pdf [file c7nj04468b1.pdf]

## Supporting Information

### Preparation of Supramolecular Silicone Elastomers via Homo- and Hetero-assembly

Jinfeng Cao, Linglong Feng, Shengyu Feng\*

Key Laboratory of Special Functional Aggregated Materials & Key Laboratory of Colloid and Interface Chemistry (Shandong University), Ministry of Education, School of Chemistry and Chemical Engineering, Shandong University, Jinan 250100, P. R. China. E-mail: fsy@sdu.edu.cn

The carbon peak (g) on the piperazine of **PyP-PDMS** shifted after the Michael addition reaction occurred. Each peak in the **A-PDMS** and **T-PDMS** spectra was consistent with the expected position of the carbon peaks as shown below.

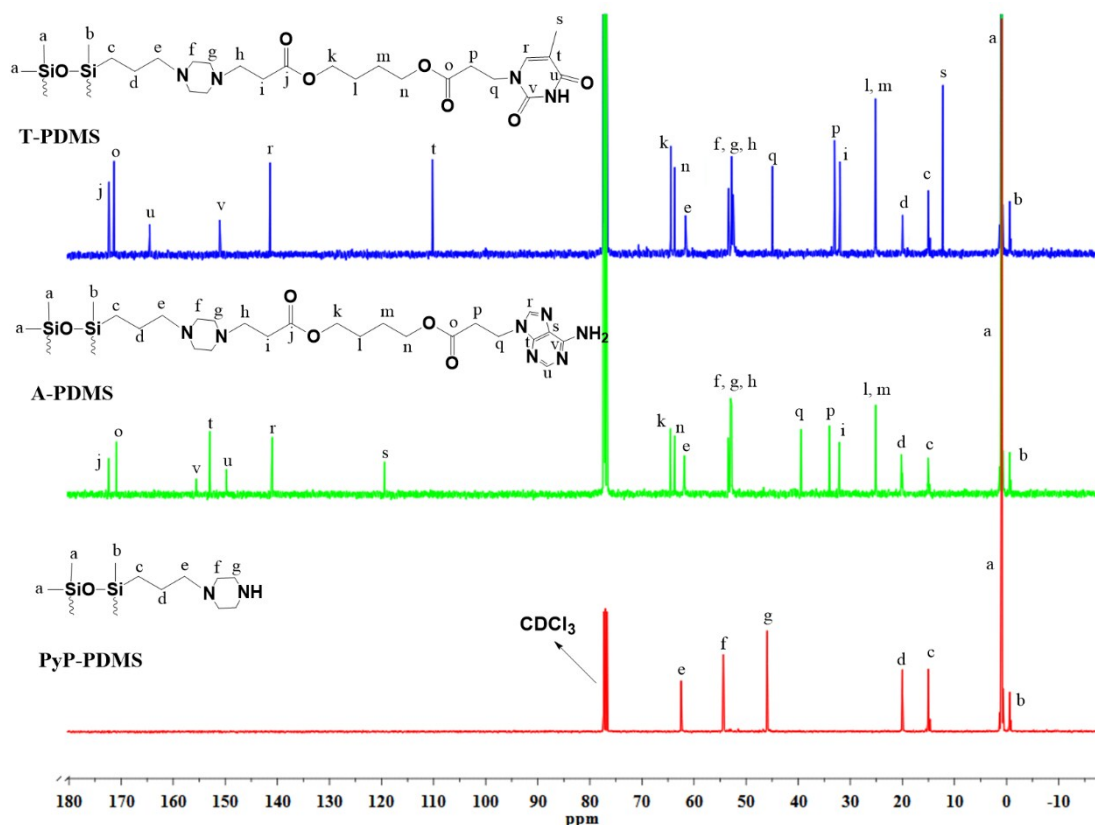

**Fig. S1** Comparison of  $^{13}\text{C}$  NMR spectra of **PyP-PDMS**, **A-PDMS** and **T-PDMS**.

The GPC comparison of **A-PDMS**, **T-PDMS** and **PyP-PDMS** in **Figure S2** shows that the molecular weights of **A-PDMS** and **T-PDMS** are larger than **PyP-PDMS**, because of the

introduction of the nucleobase. Moreover, no chain coupling or fracturing occurred after the aza-Michael reaction. These all indicate that both **A-PDMS** and **T-PDMS** were successfully synthesized.

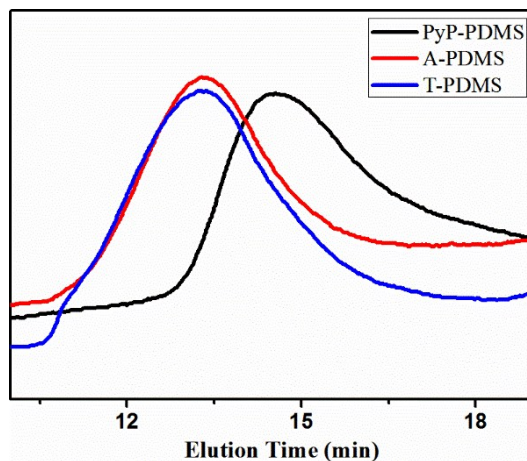

**Fig. S2** GPC chromatograms of **PyP-PDMS**, **A-PDMS** and **T-PDMS**.
